# Supplementary material
Source: PubMed Central journal article supplement (PMC7216439)

Supplemental Figure for:  
Extended Survival after Surgical Resection for Pituitary Metastases: Clinical Features, Management, and Outcomes of Metastatic Disease to the Sella  
Monica Girotra et al.

**Supplemental Figure 1.** Site of primary malignancy by gender in patients with pituitary metastasis.

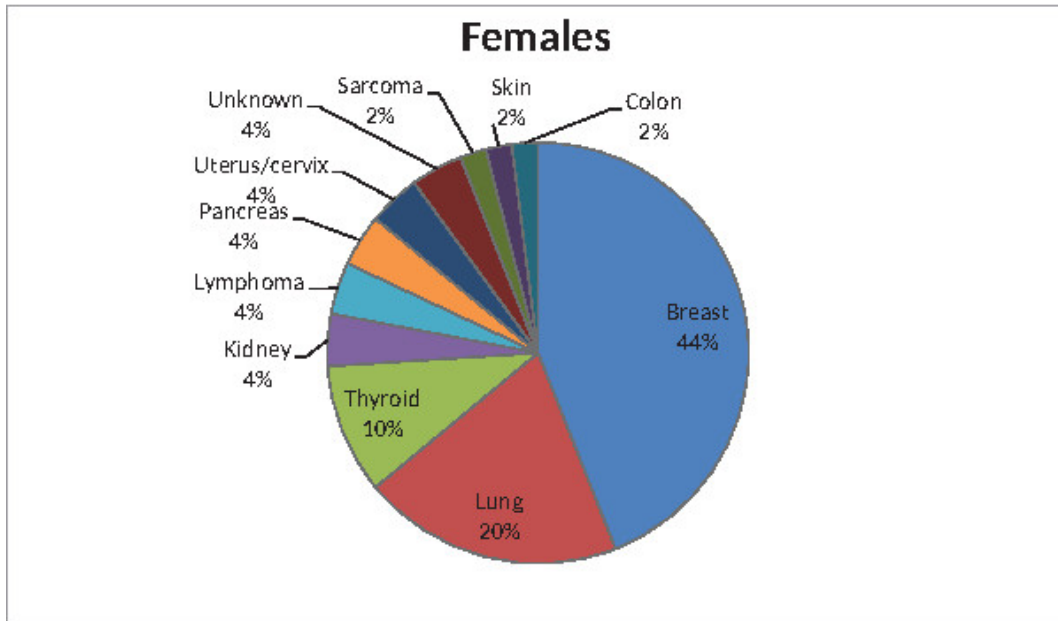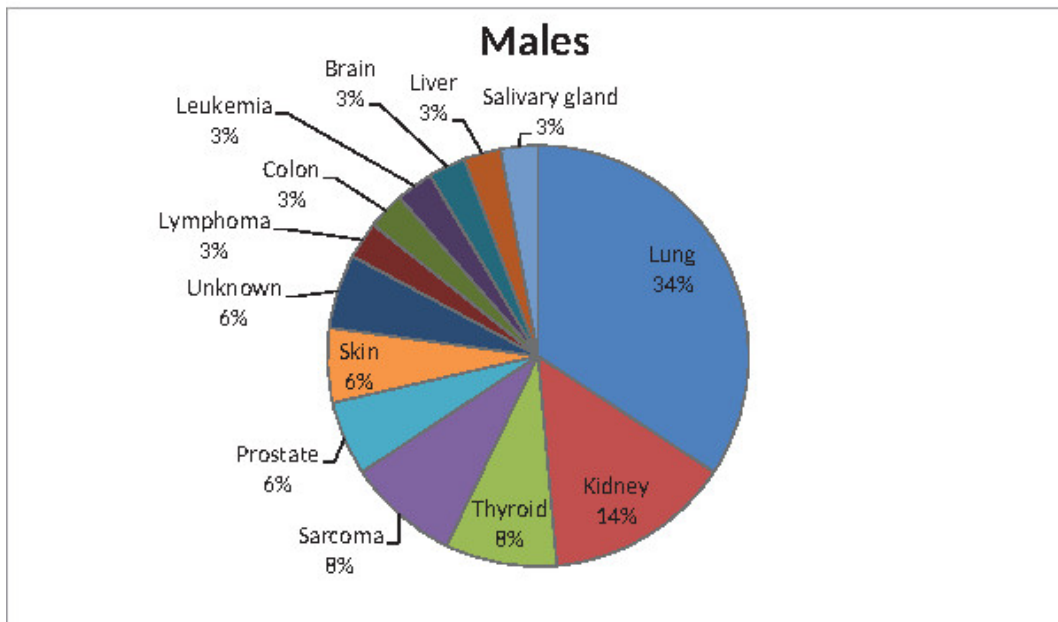

Supplement: ONCO-25-e789-s001.pdf [file ONCO-25-e789-s001.pdf]
