# Supplementary material
Source: PubMed Central journal article supplement (PMC7216439)
Supplement: ONCO-25-e789-s002.pdf [file ONCO-25-e789-s002.pdf]

Supplemental Table for:  
Extended Survival after Surgical Resection for Pituitary Metastases: Clinical Features, Management, and Outcomes of Metastatic Disease to the Sella  
Monica Girotra et al.

**Supplemental Table S1. Frequency of clinical presentations.**

| <b>Symptoms</b>       | <b>n (%)</b> |
|-----------------------|--------------|
| Visual deficit        | 53 (62)      |
| Headache              | 40 (47)      |
| Eye motility defect   | 26 (31)      |
| <b>Endocrinopathy</b> |              |
| Hypopituitarism       | 42 (70)      |
| Hypothyroidism        | 27 (59)      |
| Adrenal insufficiency | 27 (59)      |
| Hypogonadism          | 25 (66)      |
| Diabetes insipidus    | 23 (28)      |
| Hyperprolactinemia    | 5 (16)       |
